# Supplementary material for: Comparison of Drug-Related Problems in COVID-19 and Non-COVID-19 Patients Provided by a German Telepharmacy Service for Rural Intensive Care Units
Source: MDPI journal article supplement (doi:10.3390/jcm12144739), 2023-07-18
Supplement: s1 [file s1]

## Supplement

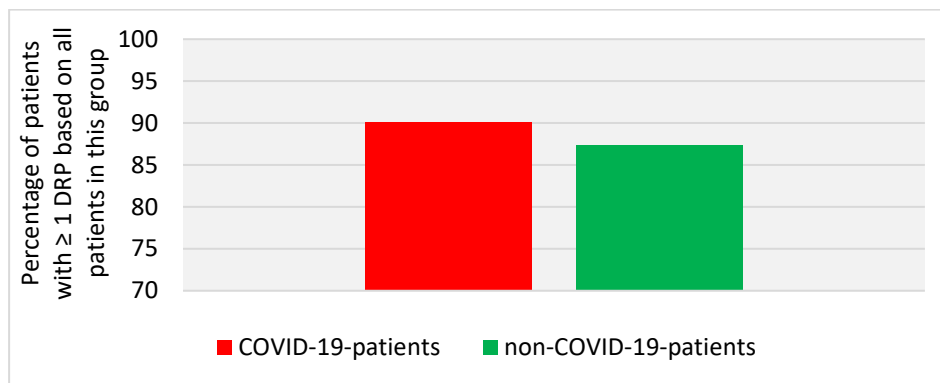

A

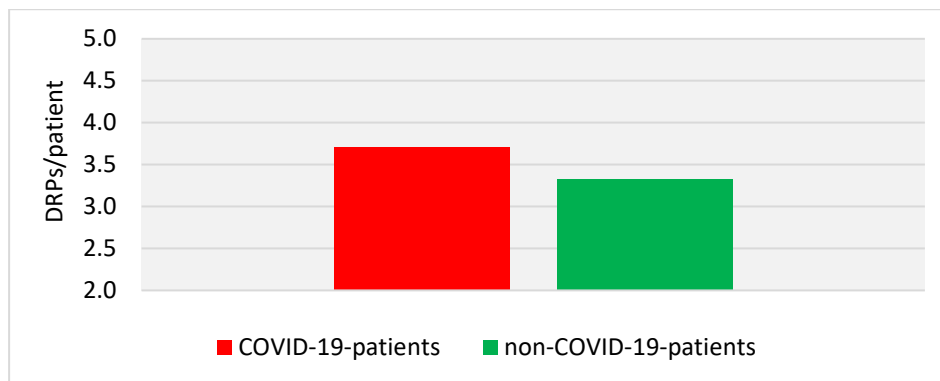

B

**Figure S1.** Percentages of patients with  $\geq 1$  DRP based on all patients and DRPs/patient-ratios in COVID-19 and non-COVID-19 patients. Part A shows the percentages of patients with  $\geq 1$  DRP based on all patients in COVID-19 and non-COVID-19 patients. The difference is non-significantly different (COVID-19 patients: 172 of 191 patients suffered from  $\geq 1$  DRP, non-COVID-19 patients: 282 of 323 patients). Part B shows the DRPs/patient-ratios in COVID-19 and non-COVID-19 patients (non-significantly different, COVID-19 patients: 707 DRPs in 191 patients, non-COVID-19 patients: 1077 DRPs in 323 patients).

| DRP category;<br>percentage of total<br>DRPs                                                                | The three most prevalent drug<br>classes with regard to total<br>drug entries | Total<br>drug<br>entries<br>(n, [%]) | Drug entries for<br>COVID-19 (n, [%])                                                                    | Drug entries for<br>NON-COVID-19 (n,<br>[%])                                     |
|-------------------------------------------------------------------------------------------------------------|-------------------------------------------------------------------------------|--------------------------------------|----------------------------------------------------------------------------------------------------------|----------------------------------------------------------------------------------|
| (Clear) indication<br>not (or no longer)<br>given;<br>15.4% of DRPs<br>[274/1784 DRPs]                      | 1. Proton pump inhibitors<br>(A02BC)                                          | 57 [20.7]                            | 28 [21.9]                                                                                                | 29 [19.7]                                                                        |
|                                                                                                             | 2. Propulsives (A03FA)                                                        | 50 [18.2]                            | 18 [14.1]                                                                                                | 32 [21.8]                                                                        |
|                                                                                                             | 3. Preparations inhibiting uric<br>acid production (M04AA)                    | 13 [4.7]                             | 6 [4.7]                                                                                                  | 7 [4.8]                                                                          |
| (Clear) indication,<br>but no drug<br>prescribed; 13.2%<br>of DRPs [235/1784<br>DRPs]                       | 1. HMG CoA reductase<br>inhibitors (C10AA)                                    | 33 [13.8]                            | 13 [13.8]                                                                                                | 20 [13.8]                                                                        |
|                                                                                                             | 2. Proton pump inhibitors<br>(A02BC)                                          | 31 [13.0]                            | 17 [18.1]                                                                                                | 14 [9.7]                                                                         |
|                                                                                                             | 3. Peripheral opioid receptor<br>antagonists (A06AH)                          | 27 [11.3]                            | 12 [12.8]                                                                                                | 15 [10.3]                                                                        |
| (Inappropriate)<br>dose; 11.0% of<br>DRPs [197/1784<br>DRPs]                                                | 1. Heparin group (B01AB)*                                                     | 53 [27.3]                            | 31 [38.8]<br><br>14x DI<br>17x DR                                                                        | 22 [19.3]<br><br>16x DI<br>6x DR                                                 |
|                                                                                                             | 2. Proton pump inhibitors<br>(A02BC)*                                         | 43 [22.2]                            | 8 [10.0]<br><br>2x DI<br>6x DR                                                                           | 35 [30.7]<br><br>2x DI<br>33x DR                                                 |
|                                                                                                             | 3. Osmotically acting laxatives<br>(A06AD)                                    | 21 [10.8]                            | 6 [7.5]<br><br>All DI                                                                                    | 15 [13.2]<br><br>All DI                                                          |
| TDM not<br>performed or not<br>considered; 9.6%<br>of DRPs [171/1784<br>DRPs]                               | 1. Heparin group (B01AB)*                                                     | 51 [29.5]                            | 37 [46.3]                                                                                                | 14 [15.1]                                                                        |
|                                                                                                             | 2. Magnesium (A12CC)                                                          | 37 [21.4]                            | 15 [18.8]                                                                                                | 22 [23.7]                                                                        |
|                                                                                                             | 3. Digitalis glycosides<br>(C01AA)*                                           | 24 [13.9]                            | 6 [7.5]                                                                                                  | 18 [19.4]                                                                        |
| Inappropriate or<br>not most suitable<br>drug in terms of<br>indication; 8.2% of<br>DRPs [146/1784<br>DRPs] | 1. Heparin group (B01AB)                                                      | 28 [19.2]                            | 12 [20.3]<br><br>4x Heparin →<br>LMWH<br>6x LMWH →<br>Heparin<br>2x LMWH →<br>Apixaban/<br>Phenprocoumon | 16 [18.0]<br><br>11x Heparin →<br>LMWH<br>5x LMWH →<br>Heparin                   |
|                                                                                                             | 2. HMG CoA reductase<br>inhibitors (C10AA)                                    | 18 [12.3]                            | 8 [13.6]<br><br>All Simvastatin →<br>Atorvastatin                                                        | 10 [11.2]<br><br>All Simvastatin →<br>Atorvastatin                               |
|                                                                                                             | 3. Sulfonamides, plain<br>(C03CA)                                             | 17 [11.6]                            | 5 [8.5]<br><br>All Furosemide →<br>Torasemide                                                            | 12 [13.5]<br><br>11x Furosemide →<br>Torasemide<br>1x Torasemide →<br>Furosemide |

**Table S1.** Overview for the five most prevalent DRP categories and associated three most common drug classes (please refer to Figure 2 in the main publication). DI = dose increase, DR = dose reduction, LMWH = low molecular weight heparin, TDM = therapeutic drug monitoring. Asterisk indicates significant difference between COVID-19 and non-COVID-19 ( $p < 0.05$ ).

| Drug class                                                                        | DRP topics                                                                                                                                 | Number of DRPs |
|-----------------------------------------------------------------------------------|--------------------------------------------------------------------------------------------------------------------------------------------|----------------|
| Glucocorticoids (H02AB, n = 22)                                                   | Enteral administration of dexamethasone (instead of intravenous, same dosage)                                                              | 14             |
|                                                                                   | Choice of corticoid agent and dosing for COVID-19 when already systemic therapy due to other reason (septic shock, ankylosing spondylitis) | 4              |
|                                                                                   | Control of side effects (blood sugar, deterioration of glaucoma)                                                                           | 2              |
|                                                                                   | Termination of dexamethasone therapy after 10 days                                                                                         | 1              |
|                                                                                   | Choice of corticoid therapy in pregnancy                                                                                                   | 1              |
| Interleukin inhibitors (L04AC, n = 3)                                             | Assessment of indication and dosage for tocilizumab in a specific patient                                                                  | 3              |
| Nucleosides and nucleotides excl. reverse transcriptase inhibitors (J05AB, n = 1) | Comparison of outcomes when 5 compared to 10 days therapy with remdesivir                                                                  | 1              |

**Table S2.** DRPs with COVID-19 specific medications (antiviral or immunosuppressive therapies).

|                         | COVID-19 patients |      |                                       |                            | NON-COVID-19 patients |      |                                       |                            |
|-------------------------|-------------------|------|---------------------------------------|----------------------------|-----------------------|------|---------------------------------------|----------------------------|
|                         | patients          | DRPs | DRPs specific for renal insufficiency | Patients with $\geq 1$ DRP | patients              | DRPs | DRPs specific for renal insufficiency | Patients with $\geq 1$ DRP |
| eGFR $\geq 60$ , no RRT | 104               | 299  | 0                                     | 88                         | 151                   | 387  | 0                                     | 122                        |
| eGFR 30-59, no RRT      | 22                | 83   | 11                                    | 21                         | 51                    | 141  | 14                                    | 46                         |
| eGFR $< 30$ , no RRT    | 15                | 54   | 12                                    | 14                         | 39                    | 112  | 34                                    | 37                         |
| iHD                     | 1                 | 1    | 1                                     | 1                          | 3                     | 16   | 2                                     | 3                          |
| PiRRT/<br>CVVH (DF)     | 8                 | 14   | 0                                     | 7                          | 12                    | 29   | 4                                     | 9                          |

**Table S3.** Number of patients, DRPs, DRPs specific for renal insufficiency, and patients with at least one DRP separated to the groups COVID-19 patients and non-COVID-19 patients. Considered for inclusion into this table were patients, that did not change the group of renal insufficiency during the consultations (79%, 406 of 514 patients). CVVH (DF) = continuous venovenous hemodialysis/ hemodiafiltration; eGFR = estimated glomerular filtration rate (CKD-EPI); iHD = intermittent hemodialysis; PiRRT = prolonged intermittent kidney replacement therapy; RRT = renal replacement therapy.

| Drug class (ATC-Code)                                                | Total (n) | COV (n) | NCOV (n) | Topics of the DRPs                                                                                                                                                                                                                                                                                                                                                                                                                                                                                                                                                                                                                                                                                                                                                                                                          |
|----------------------------------------------------------------------|-----------|---------|----------|-----------------------------------------------------------------------------------------------------------------------------------------------------------------------------------------------------------------------------------------------------------------------------------------------------------------------------------------------------------------------------------------------------------------------------------------------------------------------------------------------------------------------------------------------------------------------------------------------------------------------------------------------------------------------------------------------------------------------------------------------------------------------------------------------------------------------------|
| Heparin group (B01AB)                                                | 29        | 15      | 14       | <ul style="list-style-type: none"> <li>• Enoxaparin in therapeutic-dose: monitoring of anti-Xa in renal insufficiency (n = 13)</li> <li>• Enoxaparin in eGFR &lt; 30ml/min/1.73m<sup>2</sup>: not recommended according to SmPC, change to heparin (n = 8)</li> <li>• No anticoagulation prescribed, when indicated (n = 2)</li> <li>• Consultation for choosing most suitable drug in specific patients (n = 2)</li> <li>• Enoxaparin: dose adjustment due to accumulation risk (n = 1)</li> <li>• Enoxaparin in therapeutic dose: 12-hours dosing interval instead of 24-hours recommended (n = 1)</li> <li>• Heparin: therapeutic-dose indicated (n = 1)</li> <li>• Heparin: subcutaneous application in obese class III and severe renal insufficiency: change to infusion pump with aPTT-monitoring (n = 1)</li> </ul> |
| Carbapenems (J01DH)                                                  | 16        | 5       | 11       | <p>All DRPs were associated with meropenem</p> <ul style="list-style-type: none"> <li>• Dose reduction due to renal function (n = 9)</li> <li>• Dose increase recommended due to renal function and/or effectivity of RRT (n = 7)</li> </ul>                                                                                                                                                                                                                                                                                                                                                                                                                                                                                                                                                                                |
| Propulsives (A03FA)                                                  | 15        | 2       | 13       | <p>All DRPs were associated with Metoclopramide</p> <ul style="list-style-type: none"> <li>• Dose reduction due to eGFR &lt; 30 or &lt; 60ml/min/1.73m<sup>2</sup> according to SmPC (n = 11)</li> <li>• Recommendation to choose metoclopramide in reduced dosing for gastroparesis (n = 3)</li> <li>• Recommendation to change metoclopramide to domperidone due to possible accumulation in renal insufficiency and central antidopaminergic effects (n = 1)</li> </ul>                                                                                                                                                                                                                                                                                                                                                  |
| HMG CoA reductase inhibitors (C10AA)                                 | 10        | 5       | 5        | <ul style="list-style-type: none"> <li>• Change from simvastatin to atorvastatin (due to SmPC simvastatin doses above 10mg/day should be used with caution, n = 8)</li> <li>• Statin indicated: due to renal insufficiency choose atorvastatin (n = 1)</li> <li>• Keep simvastatin paused postoperatively, until eGFR is &gt; 30ml/min/1.73m<sup>2</sup> (n = 1)</li> </ul>                                                                                                                                                                                                                                                                                                                                                                                                                                                 |
| Combinations of penicillins, incl. beta-lactamase inhibitors (J01CR) | 10        | 4       | 6        | <ul style="list-style-type: none"> <li>• Dose reduction due to renal insufficiency (n = 9, 8-times piperacillin/tazobactam, once ampicillin/sulbactam)</li> <li>• Continuation of piperacillin/tazobactam 3x/day 4.5g at GFR &lt; 30 due to BMI 40 kg/m<sup>2</sup> (n = 1)</li> </ul>                                                                                                                                                                                                                                                                                                                                                                                                                                                                                                                                      |
| Thiazides, plain (C03AA)                                             | 6         | 1       | 5        | <p>All DRPs associated with hydrochlorothiazide (HCT)</p> <ul style="list-style-type: none"> <li>• Due to SmPC use of HCT contraindicated in eGFR &lt; 30 ml/min/1.73m<sup>2</sup> (lack of efficacy, n = 4)</li> <li>• Choose HCT for sequential nephron blockade in high doses of loop diuretics (n = 2)</li> </ul>                                                                                                                                                                                                                                                                                                                                                                                                                                                                                                       |
| ACE inhibitors, plain (C09AA)                                        | 5         | 1       | 4        | <ul style="list-style-type: none"> <li>• Dose reduction of ramipril in eGFR &lt; 30ml/min/1.73m<sup>2</sup> and/or hemodialysis (n = 4)</li> <li>• Lisinopril contraindicated in eGFR &lt; 30ml/min/1.73m<sup>2</sup> (n = 1)</li> </ul>                                                                                                                                                                                                                                                                                                                                                                                                                                                                                                                                                                                    |

|                                                   |    |   |    |                                                                                                                                                                                                                                                                                                                                                                                                                                                                                                                                                                                                                                                                                                                        |
|---------------------------------------------------|----|---|----|------------------------------------------------------------------------------------------------------------------------------------------------------------------------------------------------------------------------------------------------------------------------------------------------------------------------------------------------------------------------------------------------------------------------------------------------------------------------------------------------------------------------------------------------------------------------------------------------------------------------------------------------------------------------------------------------------------------------|
| Natural opium alkaloids (N02AA)                   | 5  | 2 | 3  | <ul style="list-style-type: none"> <li>Change morphine or oxycodone to hydromorphone / choose hydromorphone in chronic pain - due to eGFR &lt; 30 ml/min/1.73m<sup>2</sup> (n = 4)</li> <li>Morphine use in RRT favored by physician: watch of potential symptoms of glucuronide accumulation (n = 1)</li> </ul>                                                                                                                                                                                                                                                                                                                                                                                                       |
| Glycopeptide antibacterials (J01XA)               | 4  | 1 | 3  | <ul style="list-style-type: none"> <li>Vancomycin level monitoring daily or every other day in eGFR &lt; 30 or &lt; 60 ml/min/1.73m<sup>2</sup> (n = 4)</li> </ul>                                                                                                                                                                                                                                                                                                                                                                                                                                                                                                                                                     |
| Pyrazolones (N02BB)                               | 4  |   | 4  | <ul style="list-style-type: none"> <li>Discontinue metamizole (NSAID) in eGFR &lt; 60 ml/min/1.73m<sup>2</sup> (n = 4)</li> </ul>                                                                                                                                                                                                                                                                                                                                                                                                                                                                                                                                                                                      |
| Other antiepileptics (N03AX)                      | 4  | 3 | 1  | <ul style="list-style-type: none"> <li>Pregabalin: dose reduction due to eGFR &lt; 30 ml/min/1.73m<sup>2</sup> (n = 2)</li> <li>Levetiracetam: dose reduction due to eGFR &lt; 30 ml/min/1.73m<sup>2</sup> (n = 1)</li> <li>Levetiracetam: return from reduced dose to ambulant prescribed dose due to normalized renal function (n=1)</li> </ul>                                                                                                                                                                                                                                                                                                                                                                      |
| Fluoroquinolones (J01MA)                          | 4  | 2 | 2  | <ul style="list-style-type: none"> <li>Levofloxacin: dose reduction due to eGFR &lt; 30 ml/min/1.73m<sup>2</sup> (n = 2)</li> <li>Ciprofloxacin: dose reduction due to eGFR &lt; 30 ml/min/1.73m<sup>2</sup> (n = 2)</li> </ul>                                                                                                                                                                                                                                                                                                                                                                                                                                                                                        |
| Dipeptidyl peptidase 4 (DPP-4) inhibitors (A10BH) | 3  | 2 | 1  | <ul style="list-style-type: none"> <li>Sitagliptin: dose reduction due to eGFR &lt; 60ml/min/1.73m<sup>2</sup> (n = 3)</li> </ul>                                                                                                                                                                                                                                                                                                                                                                                                                                                                                                                                                                                      |
| Aldosterone antagonists (C03DA)                   | 3  |   | 3  | <p>All DRPs associated with spironolactone</p> <ul style="list-style-type: none"> <li>Contraindicated in eGFR &lt; 30 ml/min/1.73m<sup>2</sup> (n = 2)</li> <li>Adverse event: hyperkalemia potentially due to outpatient use in eGFR 30-40 ml/min/1.73m<sup>2</sup> - blood pressure sufficient, keep paused (n = 1)</li> </ul>                                                                                                                                                                                                                                                                                                                                                                                       |
| Beta-lactamase resistant penicillins (J01CF)      | 3  |   | 3  | <ul style="list-style-type: none"> <li>Flucloxacillin: no dose reduction in eGFR &gt; 10ml/min/1.73m<sup>2</sup> - risk of underdosing (n = 3)</li> </ul>                                                                                                                                                                                                                                                                                                                                                                                                                                                                                                                                                              |
| Miscellaneous                                     | 16 | 6 | 10 | <ul style="list-style-type: none"> <li>Edoxaban: dose reduction in eGFR &lt; 30 ml/min/1.73m<sup>2</sup> (n = 2)</li> <li>Change torasemide in eGFR &lt; 30 ml/min/1.73m<sup>2</sup> to furosemide to better regulate intravascular volume (n = 1)</li> <li>Change furosemide from regular applications to “on demand” (increasing creatinine and reduced urine volume, n = 1)</li> <li>Better prescribe pantoprazole instead of ranitidine for stress ulcer prophylaxis in a patient with intermittent hemodialysis (n = 1)</li> <li>Methylnaltrexone: dose reduction in eGFR &lt; 30 ml/min/1.73m<sup>2</sup> (n = 1)</li> <li>Metformin: dose reduction in eGFR &lt; 30 ml/min/1.73m<sup>2</sup> (n = 1)</li> </ul> |

|  |  |  |  |                                                                                                                                                                                                                                                                                                                                                                                                                                                                                                                                                                                                                                                                                                                                                                                                                                                                                                                                                                                                                                                                                                                                                                             |
|--|--|--|--|-----------------------------------------------------------------------------------------------------------------------------------------------------------------------------------------------------------------------------------------------------------------------------------------------------------------------------------------------------------------------------------------------------------------------------------------------------------------------------------------------------------------------------------------------------------------------------------------------------------------------------------------------------------------------------------------------------------------------------------------------------------------------------------------------------------------------------------------------------------------------------------------------------------------------------------------------------------------------------------------------------------------------------------------------------------------------------------------------------------------------------------------------------------------------------|
|  |  |  |  | <ul style="list-style-type: none"> <li>• Epoetin alfa application in chronic kidney disease: monitoring of serum iron recommended (n = 1)</li> <li>• Digitoxin plasma level monitoring in eGFR &lt; 10ml/min/1.73m<sup>2</sup> (n = 1)</li> <li>• Adverse event: hyperkalemia potentially due to outpatient use of candesartan in eGFR 30-40 ml/min/1.73m<sup>2</sup> - blood pressure sufficient, keep paused (n = 1)</li> <li>• Fluconazole: dosing recommendation for loading and maintenance dose in acute kidney injury (n = 1)</li> <li>• Parecoxib application necessary due to physician: dose reduction in eGFR 30-40 ml/min/1.73m<sup>2</sup> recommended according to SmPC (n = 1)</li> <li>• Patient with chronic pain: choose paracetamol as non-opioid analgesic in eGFR &lt; 30ml/min/1.73m<sup>2</sup> (n = 1)</li> <li>• Lithium intoxication due to acute kidney injury – monitor lithium plasma levels daily for one week (n = 1)</li> <li>• Milnacipran: dose reduction recommended in eGFR &lt; 30 ml/min/1.73m<sup>2</sup> (n = 1)</li> <li>• Cetirizine contraindicated in eGFR &lt; 30ml/min/1.73m<sup>2</sup> - stop medication (n = 1)</li> </ul> |
|--|--|--|--|-----------------------------------------------------------------------------------------------------------------------------------------------------------------------------------------------------------------------------------------------------------------------------------------------------------------------------------------------------------------------------------------------------------------------------------------------------------------------------------------------------------------------------------------------------------------------------------------------------------------------------------------------------------------------------------------------------------------------------------------------------------------------------------------------------------------------------------------------------------------------------------------------------------------------------------------------------------------------------------------------------------------------------------------------------------------------------------------------------------------------------------------------------------------------------|

**Table S4.** Drugs and drug classes that were involved in DRPs that were related to the patients' renal insufficiency. All drug classes with n ≥ 3 DRPs are shown in detail, the remaining drugs are summarized in the category "miscellaneous". aPTT = activated partial thromboplastin time, eGFR = estimated glomerular filtration rate (CKD-EPI), NSAID = non-steroidal anti-inflammatory drug, SmPC = Summary of product characteristics.
